# Supplementary material
Source: publisher figshare collection journal article supplement (https://acs.figshare.com/ndownloader/files/5892630)
Supplement: Supplementary file 1 [file 5892630]

# ORGANOMETALLICS

Organometallics, 1998, 17(3), 290-292, DOI: [10.1021/om971065m](https://doi.org/10.1021/om971065m)

## Terms & Conditions

Electronic Supporting Information files are available without a subscription to ACS Web Editions. The American Chemical Society holds a copyright ownership interest in any copyrightable Supporting Information. Files available from the ACS website may be downloaded for personal use only. Users are not otherwise permitted to reproduce, republish, redistribute, or sell any Supporting Information from the ACS website, either in whole or in part, in either machine-readable form or any other form without permission from the American Chemical Society. For permission to reproduce, republish and redistribute this material, requesters must process their own requests via the RightsLink permission system. Information about how to use the RightsLink permission system can be found at <http://pubs.acs.org/page/copyright/permissions.html>

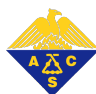

ACS Publications

MOST TRUSTED. MOST CITED. MOST READ.

Copyright © 1998 American Chemical Society

## Supporting Information

**General Procedure for the Reaction of *N,N*-bis(2-alkynyl)benzylamine with Triallylmanganate.** Manganese(II) chloride (189 mg, 1.5 mmol) was sonicated in THF under argon atmosphere for 10 min. Allylmagnesium chloride (0.77 M THF solution, 5.84 mL, 4.5 mmol) was added to the suspension of  $\text{MnCl}_2$  at 0 °C. The mixture turned into a clear brown solution. After being stirred for 20 min, a solution of *N,N*-bis(2-nonynyl)benzylamine (**1a**, 0.35 g, 1.0 mmol) in THF (2 mL) was added at 0 °C. The mixture was stirred at 0 °C for 3 h, quenched with MeOH (1 mL), and poured into water, and extracted with ethyl acetate (20 mL x 3). Concentration of dried organic layer provided a residual oil. The ratio (46:54) of products **2a** and **3a** was determined by the examination of  $^1\text{H}$  NMR of crude product. Silica gel column chromatography purification afforded 9-aza-9-benzyl-(2,6-dihexyl)bicyclo[5.3.0]deca-1(7),2-diene (**2a**,  $R_f$  = 0.45 (hex/AcOEt = 5/1), 180 mg, contaminated by unidentified by products) and bicyclo[5.3.0]deca-1(7), 3-diene (**3a**,  $R_f$  = 0.35 (hex/AcOEt = 10/1), 138 mg, 35% isolated yield). **9-aza-9-benzyl-2,6-dihexylbicyclo[5.3.0]deca-1(7),3-diene (3a):** IR (neat) 2950, 2922, 2852, 2782, 2748, 1467, 1454, 726, 697  $\text{cm}^{-1}$ ;  $^1\text{H}$  NMR ( $\text{CDCl}_3$ )  $\delta$  0.86 (t,  $J$  = 6 Hz, 6H), 1.10–1.50 (m, 20H), 2.15 (m, 2H), 2.30 (m, 1H), 2.88 (m, 1H), 3.43 (m, 4H), 5.53 (dd,  $J$  = 4.5, 11.4 Hz, 1H), 5.65 (m, 1H), 7.23–7.36 (m, 5H);  $^{13}\text{C}$  NMR ( $\text{CDCl}_3$ )  $\delta$  14.00 (2C), 22.55, 22.58, 26.79, 27.32, 29.45, 29.49, 30.18, 31.75 (2C), 33.73, 34.40, 37.00, 39.58, 60.64, 64.58, 65.12, 126.95, 127.47, 128.36, 128.84, 132.02, 133.83, 137.99, 139.72. Found: C, 85.21; H, 10.98%. Calcd for  $\text{C}_{28}\text{H}_{43}\text{N}$ : C, 85.43; H, 11.01%. An analytically pure sample of **2a** could not be obtained because of the contamination by unidentified by products. Thus the yield (30%) of **2a** was calculated from the ratio (**2a:3a** = 46:54) determined by  $^1\text{H}$  NMR of crude product.

**9-aza-9-benzyl-2,6-dimethylbicyclo[5.3.0]deca-1(7),3-diene (3b, 67:23 diastereomeric mixture):** IR (neat) 2958, 2922, 2866, 2778, 2748, 1454, 742, 696  $\text{cm}^{-1}$ ;  $^1\text{H}$  NMR ( $\text{CDCl}_3$ )  $\delta$  1.01 (d,  $J$  = 7.2 Hz, 2.33H), 1.02 (d,  $J$  = 6.9 Hz, 0.67H), 1.12 (d,  $J$  = 7.5 Hz,

2.33H), 1.13 (d,  $J = 7.5$  Hz, 0.67H), 2.12 (m, 1H), 2.36 (m, 2H), 2.85 (m, 0.23H), 3.00 (m, 0.67H), 3.40 (m, 2H), 3.53 (m, 2H), 3.75 (s, 2H), 5.55 (dd,  $J = 4.5, 11.1$  Hz, 1H), 5.67 (m, 1H), 7.24–7.38 (m, 5H);  $^{13}\text{C}$  NMR ( $\text{CDCl}_3$ ) for a major product  $\delta$  19.72, 19.91, 31.65, 33.39 (2C), 60.55, 63.99, 64.16, 126.98, 127.37, 128.37, 128.85, 133.63, 136.06, 137.27, 139.68. The compound **3b** was not stable enough to prepare a sample for elemental analysis and easily oxidized to give 9-aza-9-benzyl-2,6-dimethyl-bicyclo[5.3.0]deca-1(10),3,7-triene (**3b'**) ( $\text{C}_{18}\text{H}_{21}\text{N}$ ) standing at 25 °C for 1 d. HRMS 251.1671 Calcd for  $\text{C}_{18}\text{H}_{21}\text{N}$ :  $M^+$  251.1674.

**General Procedure for the Reaction of *N,N*-(3-trimethylsilyl-2-propynyl)benzylamine (1c) with triallylmanganate.** Manganese(II) chloride (189 mg, 1.5 mmol) was sonicated in THF (5.0 mL) under argon atmosphere for 10 min. Allylmagnesium chloride (0.77 M THF solution, 5.84 mL, 4.5 mmol) was added at 0 °C. The mixture turned into a clear brown solution and then, after being stirred for 20 min at 0 °C, a solution of **1c** (327 mg, 1.0 mmol) in THF (2 mL) was added at 0 °C. The whole was stirred at 0 °C for 3 h. Deuterium oxide (10 mmol) was added and the mixture was stirred for another 30 min at 25 °C. The mixture was poured into water extracted with ethyl acetate (3 x 20 mL). Purification of the products by silica gel column chromatography using hex/AcOEt = 10/1–5/1 as an eluant gave **6c** ( $R_f = 0.50$  (hex/AcOEt = 10/1), 146 mg, 38% yield) and **4c** ( $R_f = 0.35$  (hex/AcOEt = 5/1), 38 mg, 10% yield), and **5c** ( $R_f = 0.30$  (hex/AcOEt = 5/1), 38 mg, 10% yield). Physical data for **4c**, **5c**, and **6c** are as follows. An examination of  $^1\text{H}$  NMR of crude product containing dibenzyl ether as an internal standard revealed that the yields and ratio of products were **4c** (16%), **5c** (16%), and **6c** (43%) (**4c:5c:6c** = 21:21:58), respectively.

**9-aza-9-benzyl-[2,6-bis(trimethylsilyl)]-4-deuterio-5-methylbicyclo[5.3.0]deca-1(7),2-diene (4c):**  $^1\text{H}$  NMR ( $\text{CDCl}_3$ )  $\delta$  -0.04 (s, 9H), 0.06 (s, 9H), 0.91 (d,  $J = 6.6$  Hz, 3H), 1.27 (d,  $J = 5.1$  Hz, 1H), 2.04 (dd,  $J = 2.7, 7.8$  Hz, 1H), 2.25 (m, 1H), 3.33–3.72 (m, 4H), 3.73 (d,  $J = 13.5$  Hz, 1H), 3.78 (d,  $J = 13.5$  Hz, 1H), 6.14 (d,  $J = 7.2$  Hz, 1H), 7.20–7.37 (m, 5H);  $^{13}\text{C}$  NMR ( $\text{CDCl}_3$ )  $\delta$  -1.55, -0.61, 26.46, 37.85, 38.41 (t,

$d = 18.9$  Hz), 43.70, 60.72, 64.18, 66.44, 126.86, 128.31, 128.68, 130.23, 138.40, 139.79, 139.90, 141.33.

**9-aza-9-benzyl-[2,6-bis(trimethylsilyl)]-2-deuterio-5-**

**methylbicyclo[5.3.0]deca-1(7),3-diene (5c):** IR (neat) 2948, 2892, 2866, 2782, 1453, 1248, 836, 740, 696  $\text{cm}^{-1}$ ;  $^1\text{H}$  NMR ( $\text{CDCl}_3$ )  $\delta$  -0.01 (s, 9H), 0.08 (s, 9H), 1.09 (d,  $J = 6.6$  Hz, 3H), 1.50 (s, 1H), 2.50 (dq,  $J = 8.1, 8.1$  Hz, 1H), 3.24–3.52 (m, 4H), 3.70 (d,  $J = 13.5$  Hz, 1H), 3.76 (d,  $J = 13.5$  Hz, 1H), 5.28 (d,  $J = 12$  Hz, 1H), 5.70 (dd,  $J = 8.1, 12$  Hz, 1H), 7.19–7.36 (m, 5H);  $^{13}\text{C}$  NMR ( $\text{CDCl}_3$ )  $\delta$  -0.75, 0.26, 24.03, 33.90, 37.51, 60.81, 66.37, 68.35, 126.13, 126.82, 127.73, 128.30, 128.62, 131.04, 133.07, 139.98. Elemental analysis was performed for a mixture of **4c** and **5c**. Found: C, 71.55; H, 9.35%. Calcd for  $\text{C}_{23}\text{H}_{36}\text{DSi}_2\text{N}$ : C, 71.81; H, 9.43%.

**8-aza-8-benzyl-2,5-bis(trimethylsilyl)-3-deuteriomethyl-4-**

**methylbicyclo[4.3.0]nona-1,5-diene (6c):** IR (neat) 2950, 2916, 2892, 2784, 2754, 1455, 1334, 1250, 1163, 1146, 1061, 835, 753, 698, 634  $\text{cm}^{-1}$ ;  $^1\text{H}$  NMR ( $\text{CDCl}_3$ )  $\delta$  0.06 (s, 18H), 0.79–0.83 (m, 5H), 2.10 (q,  $J = 6.6$  Hz, 2H), 3.26 (d,  $J = 13.2$  Hz, 2H), 3.31 (d,  $J = 13.2$  Hz, 2H), 3.66 (d,  $J = 12.9$  Hz, 1H), 3.72 (d,  $J = 12.9$  Hz, 1H), 7.24–7.33 (m, 5H);  $^{13}\text{C}$  NMR ( $\text{CDCl}_3$ )  $\delta$  1.14, 18.43 (t,  $J = 18.9$  Hz), 18.72, 22.55, 31.50, 37.00, 37.03, 57.49, 60.88, 127.09, 128.34, 129.04, 130.51, 138.59. Found: C, 71.74; H, 9.34%. Calcd for  $\text{C}_{23}\text{H}_{36}\text{NSi}_2$ : C, 71.81; H, 9.34%.

**9-aza-9-benzyl-2,6-bis(trimethylsilyl)bicyclo[5.3.0]deca-1(7),3-diene (5a):** IR

(neat) 3014, 2946, 2894, 2858, 2780, 1453, 1375, 1342, 1248, 1156, 1113, 1064, 940, 916, 837, 792, 750, 729  $\text{cm}^{-1}$ ;  $^1\text{H}$  NMR ( $\text{CDCl}_3$ )  $\delta$  -0.01 (s, 9H), 0.06 (s, 9H), 1.68 (s, 1H), 2.05–2.13 (m, 1H), 2.30–2.40 (m, 2H), 3.21–3.41 (m, 4H), 3.70 (s, 2H), 5.61–5.74 (m, 2H), 7.24–7.31 (m, 5H);  $^{13}\text{C}$  NMR ( $\text{CDCl}_3$ )  $\delta$  -1.27, -0.66, 26.70, 28.29, 35.06, 60.58, 66.32, 66.72, 126.90, 128.31, 128.60, 128.74, 129.54, 131.96, 132.56, 139.69. The compound **5a** was easily oxidized to deca-1(10),3,7-triene (**5a'**): IR (neat) 2950, 2894, 1519, 1455, 1378, 1356, 1247, 1153, 837,

797, 777, 731, 694, 651, 623  $\text{cm}^{-1}$ ;  $^1\text{H}$  NMR ( $\text{CDCl}_3$ )  $\delta$  0.04 (s, 9H), 0.05 (s, 9H), 2.24 (m, 3H), 3.03 (m, 1H), 4.93 (s, 2H), 5.74 (m, 2H), 6.26 (d,  $J = 1.8$  Hz, 2H), 6.37 (d,  $J = 1.8$  Hz, 1H), 7.02 (m, 2H), 7.28 (m, 3H);  $^{13}\text{C}$  NMR ( $\text{CDCl}_3$ )  $\delta$  -1.68, -1.52, 24.03, 28.87, 28.94, 52.94, 117.63, 118.33, 122.21, 124.53, 126.70, 127.36, 128.62, 130.31, 130.33, 139.05. HRMS: 367.2142. Calcd for  $\text{C}_{22}\text{H}_{33}\text{NSi}_2$   $\text{M}^+$  367.2151.

**8-aza-8-benzyl-2,5-bis(trimethylsilyl)-3-methylbicyclo[4.3.0]nona-1,5-diene**

(**6a**): IR (neat) 2948, 2896, 2782, 2752, 1453, 1333, 1248, 1162, 1145, 1048, 962, 913, 896, 832, 748  $\text{cm}^{-1}$ ;  $^1\text{H}$  NMR ( $\text{CDCl}_3$ )  $\delta$  0.04 (s, 9H), 0.07 (s, 9H), 0.79 (t,  $J = 6.9$  Hz, 3H), 2.06–2.31 (m, 3H), 3.27–2.30 (m, 4H), 3.66 (d,  $J = 12.9$  Hz, 1H), 3.71 (d,  $J = 12.9$  Hz, 1H), 7.24–7.32 (m, 5H);  $^{13}\text{C}$  NMR ( $\text{CDCl}_3$ )  $\delta$  -1.58, 0.73, 17.98, 28.72, 33.20, 57.52, 57.59, 60.85, 124.68, 127.08, 128.33, 128.99, 132.87, 138.62, 143.37, 143.56. Found: C, 71.42; H, 9.60%. Calcd for  $\text{C}_{22}\text{H}_{35}\text{NSi}_2$ : C, 71.47; H, 9.54%.

**9-aza-9-benzyl-[2,6-bis(trimethylsilyl)]-5-methylbicyclo[5.3.0]deca-1(7),3-**

**diene (5b)**: IR (neat) 2950, 2918, 2892, 2862, 2782, 2730, 1454, 1376, 1248, 1076, 987, 875, 837, 779, 732, 696, 622  $\text{cm}^{-1}$ ;  $^1\text{H}$  NMR ( $\text{CDCl}_3$ )  $\delta$  0.00 (s, 9H), 0.08 (s, 9H), 1.10 (d,  $J = 6.9$  Hz, 3H), 1.51 (s, 1H), 2.48–2.54 (m, 2H), 3.24–3.53 (m, 4H), 3.71 (d,  $J = 12.9$  Hz, 1H), 3.77 (d,  $J = 12.9$  Hz, 1H), 5.29 (dd,  $J = 3.3, 12$  Hz, 1H), 5.71 (m, 1H), 7.22–7.36 (m, 5H);  $^{13}\text{C}$  NMR ( $\text{CDCl}_3$ )  $\delta$  -0.74, -0.23, 23.98, 33.91, 34.79, 37.53, 60.81, 66.38, 68.33, 126.17, 126.83, 127.72, 128.30, 128.64, 131.04, 133.03, 139.94. The compound **5b** was also unstable like **5a** to prepare a fine sample for elemental analysis.

**8-aza-8-benzyl-3,4-dimethyl-[2,5-bis(trimethylsilyl)]bicyclo[4.3.0]nona-1,5-**

**diene (6b)**: IR (neat) 2948, 2916, 2892, 2864, 2787, 2752, 1454, 1368, 1333, 1248, 1163, 1145, 1123, 1072, 1027, 938, 893, 832, 746, 698, 634  $\text{cm}^{-1}$ ;  $^1\text{H}$  NMR ( $\text{CDCl}_3$ )  $\delta$  0.05 (s, 18H), 0.81 (d,  $J = 6.9$  Hz, 6H), 2.10 (q,  $J = 7.2$  Hz, 2H), 3.25 (d,  $J = 12.9$  Hz, 2H), 3.30 (d,  $J = 12.9$  Hz, 2H), 3.66 (d,  $J = 12.6$  Hz, 1H), 3.72 (d,  $J = 12.6$  Hz, 1H), 7.24–7.32 (m, 5H);  $^{13}\text{C}$

NMR (CDCl<sub>3</sub>)  $\delta$  1.14, 18.72, 37.06, 57.49, 60.88, 127.08, 128.33, 129.03, 130.49, 138.60, 142.46. Found: C, 72.04; H, 9.81%. Calcd for C<sub>23</sub>H<sub>37</sub>NSi<sub>2</sub>: C, 71.99; H, 9.72%.

**9-aza-9-benzyl-[2,5-bis(trimethylsilyl)]-5-decylbicyclo[5.3.0]deca-1(7),3-diene (5d):** IR (neat) 2918, 2850, 2780, 2732, 1466, 1454, 1376, 1247, 1070, 830, 732, 696, 623 cm<sup>-1</sup>; <sup>1</sup>H NMR (CDCl<sub>3</sub>)  $\delta$  -0.02 (s, 9H), 0.08 (s, 9H), 0.86 (t, *J* = 7.2 Hz, 3H), 1.43–1.46 (m, 18H), 1.62 (s, 1H), 2.25 (m, 1H), 2.51 (s, 1H), 3.23–3.52 (m, 4H), 3.70 (d, *J* = 13.2 Hz, 1H), 3.76 (d, *J* = 13.2 Hz, 1H), 5.35 (dd, *J* = 3.3, 12.3 Hz, 1H), 5.71 (m, 1H), 7.22–7.35 (m, 5H); <sup>13</sup>C NMR (CDCl<sub>3</sub>)  $\delta$  -0.69, -0.23, 14.00, 22.59, 28.33, 29.27, 29.56, 29.59, 29.61, 29.63, 31.85, 34.37, 34.79, 37.69, 39.17, 60.82, 66.34, 68.15, 126.31, 126.83, 127.72, 128.31, 128.63, 131.20, 132.51, 139.00. Found: C, 75.28; H, 11.08%. Calcd for C<sub>32</sub>H<sub>55</sub>NSi<sub>2</sub>: C, 75.37; H, 10.87%. <sup>1</sup>H NMR and <sup>13</sup>C NMR data were for major diastereomer (diastereomeric ratio was 7:1).

**8-aza-8-benzyl-[2,5-bis(trimethylsilyl)]-3-decyl-4-methylbicyclo[4.3.0]nona-1,5-diene (6d):** IR (neat) 2916, 2850, 2780, 2750, 1454, 1334, 1248, 1159, 1145, 895, 832, 751, 697, 634 cm<sup>-1</sup>; <sup>1</sup>H NMR (CDCl<sub>3</sub>)  $\delta$  0.05 (s, 9H), 0.054 (s, 9H), 0.82 (d, *J* = 6.9 Hz, 3H), 0.86 (t, *J* = 6.3 Hz, 3H), 1.06–1.34 (m, 18H), 1.93 (m, 1H), 2.31 (q, *J* = 7.2 Hz, 1H), 3.22–3.33 (m, 4H), 3.66 (d, *J* = 13.2 Hz, 1H), 3.72 (d, *J* = 13.2 Hz, 1H), 7.24–7.33 (m, 5H); <sup>13</sup>C NMR (CDCl<sub>3</sub>)  $\delta$  -1.11, -0.95, 14.00, 18.70, 22.58, 26.82, 27.42, 29.26, 29.53, 29.76, 31.17, 31.50, 31.83, 32.39, 42.72, 57.44, 57.47, 60.87, 127.08, 128.34, 129.04, 130.16, 130.82, 138.59, 142.71, 143.03. Found: C, 75.28; H, 11.08%. Calcd for C<sub>32</sub>H<sub>55</sub>NSi<sub>2</sub>: C, 75.37; H, 10.87%.

**N-3-phenyl-2-propynyl-3,4-diphenylmethylenepyrrolidine (8):** white needle solid, mp 108–109 °C; <sup>1</sup>H NMR (CDCl<sub>3</sub>)  $\delta$  3.85 (s, 2H), 3.91 (s, 2H), 3.92 (s, 2H), 7.02 (s, 2H), 7.23–7.50 (m, 15H); <sup>13</sup>C NMR (CDCl<sub>3</sub>)  $\delta$  43.24, 55.97, 83.97, 86.09, 118.99, 123.02, 126.96, 128.27, 128.37, 128.55, 128.76, 131.88, 137.55, 139.71. Found: C, 88.43; H, 6.04%. Calcd

for C<sub>27</sub>H<sub>23</sub>N: C, 89.71; H, 6.41%.

**General Procedure for the Reaction of Enyne and Diene with Triallylmanganate.**

The reaction of *N,N*-diallylbenzylamine (**12a**) with triallylmanganate is representative. A solution of **12a** (187 mg, 1.0 mmol) in THF (2 mL) was added to a solution of triallylmanganate, generated from MnCl<sub>2</sub> (189 mg, 1.5 mmol) and allylmagnesium chloride (0.77 M THF solution, 5.84 mL, 4.5 mmol) in THF at 0 °C. The resulting mixture was stirred for 1 h at 0 °C, and then for 20 h at 25 °C. The reaction was quenched with methanol and the product was extracted with ethyl acetate (20 mL x 3). The combined organic layers were washed with water, dried over Na<sub>2</sub>SO<sub>4</sub> and concentrated. Silica gel column chromatography gave *N*-benzyl-*cis*-3,4-dimethylpyrrolidine (**13a**, 132 mg) in 70% yield: IR (neat) 3024, 2956, 2910, 2870, 2780, 1496, 1476, 1454, 1375, 1129, 1071, 1029, 736, 697 cm<sup>-1</sup>; <sup>1</sup>H NMR (CDCl<sub>3</sub>) δ 0.89 (d, *J* = 6.9 Hz, 6H), 1.94 (dd, *J* = 7.5, 9.3 Hz, 2H), 2.29 (m, 2H), 3.01 (dd, *J* = 6.9, 9.3 Hz, 2H), 7.24–7.32 (m, 5H); <sup>13</sup>C NMR (CDCl<sub>3</sub>) δ 14.30, 34.29, 61.03, 62.26, 126.84, 128.23, 128.90, 139.61.

**N-benzyl-3-methyl-4-trimethylsilylmethylidenepyrrolidine (10a):** IR (neat) 2952, 2924, 2868, 2780, 1635, 1454, 1248, 865, 840, 744, 697 cm<sup>-1</sup>; <sup>1</sup>H NMR (CDCl<sub>3</sub>) δ 0.04 (s, 9H), 1.04 (d, *J* = 6.9 Hz, 3H), 1.96 (dd, *J* = 8.7, 8.7 Hz, 1H), 2.62 (m, 1H), 2.92 (d, *J* = 8.7 Hz, 1H), 2.99 (d, *J* = 16.5 Hz, 1H), 3.51 (d, *J* = 16.5 Hz, 1H), 3.55 (d, *J* = 12.6 Hz, 1H), 3.64 (d, *J* = 12.6 Hz, 1H), 5.27 (m, 1H); <sup>13</sup>C NMR (CDCl<sub>3</sub>) δ 0.59, 17.24, 40.25, 59.41, 60.77, 61.23, 116.74, 127.02, 128.32, 128.90, 138.94, 162.85.

**N-allyl-3-methyl-4-trimethylsilylmethylidenepyrrolidine (10b):** IR (neat) 2952, 2868, 2766, 1633, 1248, 918, 865, 839, 689 cm<sup>-1</sup>; <sup>1</sup>H NMR (CDCl<sub>3</sub>) δ 0.04 (s, 9H), 1.05 (d, *J* = 6.9 Hz, 3H), 1.92 (dd, *J* = 8.7, 8.7 Hz, 1H), 2.63 (m, 1H), 2.91 (d, *J* = 14.4 Hz, 1H), 2.89 (dd, *J* = 8.7, 8.7 Hz, 1H), 3.08 (d, *J* = 6.6 Hz, 2H), 3.50 (d, *J* = 14.4 Hz, 1H), 5.20 (m, 2H), 5.27 (m, 1H), 5.92 (m, 1H); <sup>13</sup>C NMR (CDCl<sub>3</sub>) δ -0.61, 17.24, 40.13, 59.12, 59.44, 61.37, 116.86, 117.07, 135.78, 162.63. Found: C, 68.55; H, 11.06%. Calcd for C<sub>12</sub>H<sub>23</sub>NSi: C, 68.83; H, 11.07%.

**N-allyl-3-methyl-4-heptylidene pyrrolidine (10c):** IR (neat) 2954, 2922, 2852, 2768, 1468, 1458, 1340, 1141, 994, 917, 881  $\text{cm}^{-1}$ ;  $^1\text{H}$  NMR ( $\text{CDCl}_3$ )  $\delta$  0.83 (t,  $J = 6.6$  Hz, 3H), 1.04 (d,  $J = 6.9$  Hz, 3H), 1.18–1.36 (m, 8H), 1.88 (m, 2H), 1.95 (dd,  $J = 8.7, 8.7$  Hz, 1H), 2.64 (m, 1H), 2.86 (d,  $J = 13.8$  Hz, 1H), 2.98 (dd,  $J = 8.7, 8.7$  Hz, 1H), 3.09 (m, 2H), 3.45 (d,  $J = 13.8$  Hz, 1H), 5.16 (m, 3H), 5.92 (m, 1H);  $^{13}\text{C}$  NMR ( $\text{CDCl}_3$ )  $\delta$  13.99, 17.51, 22.54, 28.88, 29.35, 29.42, 31.70, 37.14, 56.60, 59.53, 62.23, 116.91, 120.02, 136.04, 143.71. Found: C, 81.24; H, 12.49%. Calcd for  $\text{C}_{15}\text{H}_{27}\text{N}$ : C, 81.38; H, 12.29%.

**N-allyl-3-methyl-4-(2-allyl-heptylidene)pyrrolidine (11):** IR (neat) 2954, 2924, 2854, 2766, 1456, 1342, 1132, 993, 914  $\text{cm}^{-1}$ ;  $^1\text{H}$  NMR ( $\text{CDCl}_3$ )  $\delta$  0.85 (t,  $J = 6.6$  Hz, 3H), 1.09 (d,  $J = 6.9$  Hz, 3H), 1.18–1.36 (m, 8H), 1.86 (t,  $J = 8.1$  Hz, 2H), 2.42 (d,  $J = 3.3, 9.0$  Hz, 1H), 2.57 (d,  $J = 6.6, 9.0$  Hz, 1H), 2.76 (d,  $J = 6.3$  Hz, 2H), 2.94 (d,  $J = 13.2$  Hz, 1H), 3.06 (m, 2H), 3.33 (d,  $J = 13.2$  Hz, 1H), 5.06 (m, 4H), 5.73 (m, 1H), 5.91 (m, 1H);  $^{13}\text{C}$  NMR ( $\text{CDCl}_3$ )  $\delta$  13.98, 20.29, 22.52, 27.61, 29.26, 31.69, 32.37, 35.33, 36.21, 57.23, 59.54, 62.25, 115.40, 116.70, 128.52, 136.16, 136.99, 139.05. Found: C, 82.70; H, 12.02%. Calcd for  $\text{C}_{18}\text{H}_{31}\text{N}$ : C, 82.69; H, 11.95%.

**N-cyclohexyl-cis-3,4-dimethylpyrrolidine (13c):** IR (neat) 2906, 2852, 2766, 1474, 1464, 1449, 1375, 1181, 1138, 891  $\text{cm}^{-1}$ ;  $^1\text{H}$  NMR ( $\text{CDCl}_3$ )  $\delta$  0.85 (d,  $J = 6.6$  Hz, 6H), 1.07–1.24 (m, 5H), 1.55–1.58 (m, 1H), 1.68–1.72 (m, 2H), 1.83–1.91 (m, 5H), 2.23 (m, 2H), 3.14 (dd,  $J = 7.2, 9.6$  Hz, 2H);  $^{13}\text{C}$  NMR ( $\text{CDCl}_3$ )  $\delta$  14.36, 25.08, 26.02, 31.84, 33.91, 59.63, 63.91. Found: C, 79.52; H, 13.08%. Calcd for  $\text{C}_{12}\text{H}_{23}\text{N}$ : C, 79.49; H, 12.79%.

**N-benzyl-cis-3,4-dideuteriomethylpyrrolidine (14):** IR (neat) 2950, 2922, 2778, 1453, 736, 697  $\text{cm}^{-1}$ ;  $^1\text{H}$  NMR ( $\text{CDCl}_3$ )  $\delta$  0.87 (m, 4H), 1.94 (dd,  $J = 7.8, 9.6$  Hz, 2H), 2.28 (m, 2H), 3.00 (dd,  $J = 7.2, 9.6$  Hz, 2H), 3.58 (s, 2H), 7.23–7.34 (m, 5H);  $^{13}\text{C}$  NMR ( $\text{CDCl}_3$ )  $\delta$  14.01 (t,  $J = 18.9$  Hz), 34.20, 61.03, 62.23, 126.84, 128.23, 128.90, 139.62.



**N-benzyl-*cis*-3,4-diiodomethylpyrrolidine (15):** IR (neat) 2950, 2906, 2786, 1494, 1452, 1181, 1152, 737, 697  $\text{cm}^{-1}$ ;  $^1\text{H}$  NMR ( $\text{CDCl}_3$ )  $\delta$  2.42 (dd,  $J = 6.0, 9.6$  Hz, 2H), 2.69 (m, 2H), 3.01 (dd,  $J = 6.6, 9.6$  Hz, 2H), 3.13 (dd,  $J = 9.6, 9.6$  Hz, 2H), 3.30 (dd,  $J = 5.4, 9.6$  Hz, 2H), 3.60 (s, 2H), 7.24–7.33 (m, 5H);  $^{13}\text{C}$  NMR ( $\text{CDCl}_3$ )  $\delta$  4.97, 44.30, 59.88, 60.90, 127.13, 128.40, 128.62, 138.78.
